# Supplementary material for: Scientific opinion on the tolerable upper intake level for preformed vitamin A and β‐carotene
Source: PubMed Central journal article supplement (PMC11154838; doi:10.2903/j.efsa.2024.8814), 2024-06-06
Supplement: EFS2-22-e8814-s002.pdf [file EFS2-22-e8814-s002.pdf]

Annex to: EFSA NDA Panel, 2024. Scientific opinion on the Tolerable Upper Intake Level for preformed vitamin A and  $\beta$ -carotene. doi:10.2903/j.efsa.2024.8814

© 2024 Wiley-VCH Verlag GmbH & Co. KgaA on behalf of the European Food Safety Authority.

## Annex H – Studies excluded at full-text screening and data extraction level

### A.1. Teratogenicity (sQ3a)

**Table 1. Excluded studies during full-text screening for sQ3a**

| Reference                                                                                                                                                                                                                                                                                                       | Reason for exclusion                                                                     |
|-----------------------------------------------------------------------------------------------------------------------------------------------------------------------------------------------------------------------------------------------------------------------------------------------------------------|------------------------------------------------------------------------------------------|
| <b>Balogun, O. O., da Silva Lopes, K., Ota, E., Takemoto, Y., Rumbold, A., Takegata, M., Mori, R.</b> (2016). Vitamin supplementation for preventing miscarriage <i>Cochrane Database of Systematic Reviews</i> , 2016(5), CD004073                                                                             | Outcome not relevant (not teratogenic outcomes in offspring)                             |
| <b>Carmichael, S. L., Shaw, G. M., Selvin, S., Schaffer, D. M.</b> (2003). Diet quality and risk of neural tube defects <i>Medical Hypotheses</i> , 60(3), 351-355                                                                                                                                              | Wrong exposure (no quantitative estimates of vitamin A intake)                           |
| <b>Carmichael, S. L., Yang, W., Shaw, G. M., National Birth Defects Prevention, Study</b> (2013). Maternal dietary nutrient intake and risk of preterm delivery <i>American Journal of Perinatology</i> , 30(7), 579-88                                                                                         | Outcome not relevant (not teratogenic outcomes in offspring)                             |
| <b>Chowchuen, B., Thanaviratananich, S., Chichareon, V., Kamolnate, A., Uewichitrapochana, C., Godfrey, K.</b> (2015). A Multisite Study of Oral Clefts and Associated Abnormalities in Thailand: The Epidemiologic Data <i>Plastic and Reconstructive Surgery - Global Open</i> , 3(12), e583                  | Wrong exposure (no quantitative estimates of vitamin A intake)                           |
| <b>Cortes-Albornoz, M. C., Garcia-Guaqueta, D. P., Velez-Van-meerbeke, A., Talero-Gutierrez, C.</b> (2021). Maternal nutrition and neurodevelopment: A scoping review <i>Nutrients</i> , 13(10), 3530                                                                                                           | Wrong publication type (scoping review, not including original data)                     |
| <b>Deka, D., Sharma, N.</b> Nutrition in pregnancy and lactation                                                                                                                                                                                                                                                | Other (full-text not found)                                                              |
| <b>Duerbeck, N.B., Dowling, D.D.</b> (2012) Vitamin A: too much of a good thing? <i>Obstet Gynecol Surv.</i> 2012 Feb;67(2):122-8. doi: 10.1097/OGX.0b013e318244c52d.                                                                                                                                           | Wrong publication type (review, not including original data)                             |
| <b>Felix JF, van Dooren MF, Klaassens M, Hop WC, Torfs CP, Tibboel D.</b> (2008) Environmental factors in the etiology of esophageal atresia and congenital diaphragmatic hernia: results of a case-control study. <i>Birth Defects Res A Clin Mol Teratol.</i> 2008 Feb;82(2):98-105. doi: 10.1002/bdra.20423. | Wrong exposure (no quantitative estimates of vitamin A intake)                           |
| <b>Gilchrist, H., Taranath, D. A., Gole, G. A.</b> (2010). Ocular malformation in a newborn secondary to maternal hypovitaminosis A <i>Journal of Aapos: American Association for Pediatric Ophthalmology &amp; Strabismus</i> , 14(3), 274-6                                                                   | Wrong exposure (no quantitative estimates of vitamin A intake)                           |
| Impact of Maternal Vitamin A or Beta-Carotene Supplementation on Maternal and Infant Mortality in Bangladesh                                                                                                                                                                                                    | Wrong publication type (trial registration, not including original data)                 |
| <b>Labrique, A. B., Christian, P., Klemm, R. D., Rashid, M., Shamim, A. A., Massie, A., Schulze, K., Hackman, A., West, K. P., Jr.</b> (2011). A cluster-randomized, placebo-controlled, maternal vitamin A or beta-carotene supplementation trial in Bangladesh: design and methods <i>Trials</i> , 12, 102    | Wrong publication type (this is a design and methods paper, not including original data) |

|                                                                                                                                                                                                                                                                                                                                                                                     |                                                                         |
|-------------------------------------------------------------------------------------------------------------------------------------------------------------------------------------------------------------------------------------------------------------------------------------------------------------------------------------------------------------------------------------|-------------------------------------------------------------------------|
| <b>Lee, Y. Q., Collins, C. E., Gordon, A., Rae, K. M., Pringle, K. G.</b> (2018). The Relationship between Maternal Nutrition during Pregnancy and Offspring Kidney Structure and Function in Humans: A Systematic Review <i>Nutrients</i> , 10(2), 21                                                                                                                              | Wrong publication type (systematic review, not including original data) |
| <b>Pace, N. D., Desrosiers, T. A., Carmichael, S. L., Shaw, G. M., Olshan, A. F., Siega-Riz, A. M., National Birth Defects Prevention, Study</b> (2018). Antioxidant Consumption is Associated with Decreased Odds of Congenital Limb Deficiencies <i>Paediatric and Perinatal Epidemiology</i> , 32(1), 90-99                                                                      | Wrong exposure (no quantitative estimates of vitamin A intake)          |
| <b>Ramakrishnan, U., Nguyen, P. H., Gonzalez-Casanova, I., Pham, H., Hao, W., Nguyen, H., Truong, T. V., Nguyen, S., Harding, K. B., Reinhart, G. A., Neufeld, L. M., Martorell, R.</b> (2016). Neither preconceptional weekly multiple micronutrient nor iron-folic acid                                                                                                           | Wrong exposure (no quantitative estimates of vitamin A intake)          |
| <b>Siebold, B., Heike, C. L., Leroux, B. G., Speltz, M. L., Drake, A. F., Johns, A. L., Kapp-Simon, K. A., Magee, L., Luquetti, D. V.</b> (2019). Evaluation of prenatal diabetes mellitus and other risk factors for craniofacial microsomia <i>Birth Defects Research</i> , 111(11), 649-658                                                                                      | Wrong exposure (no quantitative estimates of vitamin A intake)          |
| <b>Smedts HP, de Vries JH, Rakhshandehroo M, Wildhagen MF, Verkleij-Hagoort AC, Steegers EA, Steegers-Theunissen RP.</b> (2009) High maternal vitamin E intake by diet or supplements is associated with congenital heart defects in the offspring. <i>BJOG</i> . 2009 Feb;116(3):416-23. doi: 10.1111/j.1471-0528.2008.01957.x.                                                    | Wrong exposure (intake assessment 16 months post-partum)                |
| <b>Wang, D., Zhang, Y., Jiang, Y., Ye, Y., Ji, M., Dou, Y., Chen, X., Li, M., Ma, X., Sheng, W., Huang, G., Yan, W., Spcc group</b> (2019). Shanghai Preconception Cohort (SPCC) for the association of periconceptional parental key nutritional factors with health outcomes of children with congenital heart disease: a cohort profile <i>BMJ Open</i> , 9(11), e031076         | Wrong exposure (no quantitative estimates of vitamin A intake)          |
| <b>Yakoob, M. Y., Menezes, E. V., Soomro, T., Haws, R. A., Darmstadt, G. L., Bhutta, Z. A.</b> (2009). Reducing stillbirths: behavioural and nutritional interventions before and during pregnancy <i>BMC Pregnancy &amp; Childbirth</i> , 9 Suppl 1:S3                                                                                                                             | Wrong publication type (systematic review, not including original data) |
| <b>Zhang, B. Y., Zhang, T., Lin, L. M., Wang, F., Xin, R. L., Gu, X., He, Y. N., Yu, D. M., Li, P. Z., Zhang, Q. S., Zhao, J., Qin, Y. F., Yang, X. F., Chen, G., Liu, J. F., Song, X. M., Zheng, X. Y.</b> (2008). Correlation between birth defects and dietary nutrition status in a high incidence area of China. <i>Biomedical &amp; Environmental Sciences</i> , 21(1), 37-44 | Wrong exposure (no quantitative estimates of vitamin A intake)          |

**Table 2. Excluded studies during data extraction for sQ3a**

| Reference                                                                                                                                                                                                                                                                                                                              | Reason for exclusion                                                                                                                                            |
|----------------------------------------------------------------------------------------------------------------------------------------------------------------------------------------------------------------------------------------------------------------------------------------------------------------------------------------|-----------------------------------------------------------------------------------------------------------------------------------------------------------------|
| <b>Abdou, M.S.M., Sherif, A.A.R., Wahdan, I.M.H. et al.</b> (2019). Pattern and risk factors of congenital anomalies in a pediatric university hospital, Alexandria, Egypt. <i>J. Egypt. Public. Health. Assoc.</i> 94, 3 (2019). <a href="https://doi.org/10.1186/s42506-018-0004-3">https://doi.org/10.1186/s42506-018-0004-3</a>    | Exposure excess vitamin A was not sufficiently described to determine whether “pills taken” referred to only authorised food supplements or included also drugs |
| <b>Carmichael SL, Ma C, Witte JS, Yang W, Rasmussen SA, Brunelli L, Nestoridi E, Shaw GM, Feldkamp ML.</b> (2020) Congenital diaphragmatic hernia and maternal dietary nutrient pathways and diet quality in the National Birth Defects Prevention Study. <i>Birth Defects Res.</i> 2020 Nov;112(18):1475-1483. doi: 10.1002/bdr2.1770 | Wrong exposure (no quantitative estimates of vitamin A)                                                                                                         |
| <b>Krapels IP, van Rooij IA, Ocké MC, West CE, van der Horst CM, Steegers-Theunissen RP.</b> (2004). Maternal nutritional status and the risk for                                                                                                                                                                                      | Wrong exposure (intake assessment ~14 months post-partum)                                                                                                       |

|                                                                                                                                                                                                                                                                                                                                                                  |                                                                                                                    |
|------------------------------------------------------------------------------------------------------------------------------------------------------------------------------------------------------------------------------------------------------------------------------------------------------------------------------------------------------------------|--------------------------------------------------------------------------------------------------------------------|
| orofacial cleft offspring in humans. <i>J Nutr.</i> 2004 Nov;134(11):3106-13. doi: 10.1093/jn/134.11.3106.                                                                                                                                                                                                                                                       |                                                                                                                    |
| <b>Moore KJ, Carmichael SL, Forestieri NE, et al.</b> (2020). Maternal diet as a risk factor for primary congenital glaucoma and defects of the anterior segment of the eye in the National Birth Defects Prevention Study. <i>Birth Defects Research.</i> 2020; 112: 503–514. <a href="https://doi.org/10.1002/bdr2.1664">https://doi.org/10.1002/bdr2.1664</a> | Wrong exposure (no quantitative estimates of vitamin A or preformed vitamin A)                                     |
| <b>Shaw, G. M., Carmichael, S. L., Laurent, C., Louik, C., Richard H. Finnell R. H., Lammer, E. J.</b> (2007). Nutrient Intakes in Women and Risks of Anophthalmia and Microphthalmia in Their Offspring. <i>Birth Defects Research,</i> 79(10), 708-713                                                                                                         | Overlaps with other reference that is more recent and updated (Weber 2018)                                         |
| <b>Skare, O., Jugessur, A., Lie, R. T., Wilcox, A. J., Murray, J. C., Lunde, A., Nguyen, T. T., Gjessing, H. K.</b> (2012). Application of a novel hybrid study design to explore gene-environment interactions in orofacial clefts <i>Annals of Human Genetics,</i> 76(3), 221-36                                                                               | GxE interaction between maternal exposure and genetic variants. Not comparable to the rest of the body of evidence |

## B.1. Hepatotoxicity (sQ4a)

**Table 3. Excluded studies during full-text screening for sQ4a**

| Reference                                                                                                                                                                                                                                                                                                                                                                                                                       | Reason for exclusion                                                |
|---------------------------------------------------------------------------------------------------------------------------------------------------------------------------------------------------------------------------------------------------------------------------------------------------------------------------------------------------------------------------------------------------------------------------------|---------------------------------------------------------------------|
| <b>Ake, M., Poby, A. G., Malan, K. A., Tebi, A., Monnet, D.</b> (2001). Effects of vitamin A supplementation on nutritional markers on the follow-up of malnutrition in children. <i>Annales de biologie clinique.</i> 2001. 59:417-421                                                                                                                                                                                         | Language (full text not in English)                                 |
| <b>Bjelakovic G, Gluud LL, Nikolova D, Bjelakovic M, Nagorni A, Gluud C.</b> (2011) Antioxidant supplements for liver diseases. <i>Cochrane Database Syst Rev.</i> 2011 Mar 16;(3):CD007749. doi: 10.1002/14651858.CD007749.pub2                                                                                                                                                                                                | Wrong publication type (meta-analysis, not including original data) |
| <b>Bjelakovic, G., Gluud, L. L., Nikolova, D., Bjelakovic, M., Nagorni, A., Gluud, C.</b> (2010). Meta-analysis: antioxidant supplements for liver diseases - the Cochrane Hepato-Biliary Group. <i>Alimentary Pharmacology &amp; Therapeutics.</i> 2010. 32:356-67                                                                                                                                                             | Wrong publication type (meta-analysis, not including original data) |
| <b>Farhangi, M. A., Keshavarz, S. A., Eshraghian, M., Ostadrahimi, A., Saboor-Yaraghi, A. A.</b> (2012). The effect of vitamin A supplementation on thyroid function in premenopausal women. <i>Journal of the American College of Nutrition.</i> 2012. 31:268-74                                                                                                                                                               | Outcome not relevant                                                |
| <b>Gannon B, Kaliwile C, Arscott SA, Schmaelzle S, Chileshe J, Kalungwana N, Mosonda M, Pixley K, Masi C, Tanumihardjo SA.</b> (2014) Biofortified orange maize is as efficacious as a vitamin A supplement in Zambian children even in the presence of high liver reserves of vitamin A: a community-based, randomized placebo-controlled trial. <i>Am J Clin Nutr.</i> 2014 Dec;100(6):1541-50. doi: 10.3945/ajcn.114.087379. | Outcome not relevant                                                |
| <b>Ginawi, I. A., Ahmed, M. Q., Ahmad, I., Al-Hazimi, A. M.</b> (2013). Effect of zinc and vitamin a supplementation along with inter-tubercular treatment in pulmonary tuberculosis in north indian patients. <i>International Journal of Pharmaceutical Sciences and Research.</i> 2013. 4(9):3426-3431                                                                                                                       | Outcome not relevant                                                |
| <b>Greenberger, S., Harats, D., Salameh, F., Lubish, T., Harari, A., Trau, H., Shaish, A.</b> (2012). 9-cis-Rich $\beta$ -Carotene Powder of the Alga <i>Dunaliella</i> Reduces the Severity of Chronic Plaque Psoriasis: A Randomized, Double-Blind, Placebo-Controlled Clinical Trial, <i>Journal of the American College of Nutrition,</i> 31:5, 320-326, DOI: 10.1080/07315724.2012.10720430                                | Wrong exposure (no quantitative estimates of vitamin A intake)      |
| <b>Lai GY, Weinstein SJ, Taylor PR, McGlynn KA, Virtamo J, Gail MH, Albanes D, Freedman ND.</b> (2014). Effects of $\alpha$ -tocopherol and $\beta$ -carotene supplementation on liver cancer incidence and chronic liver disease mortality in                                                                                                                                                                                  | Outcome not relevant                                                |

|                                                                                                                                                                                                                                                                                                                                                                                                                                |                                                                |
|--------------------------------------------------------------------------------------------------------------------------------------------------------------------------------------------------------------------------------------------------------------------------------------------------------------------------------------------------------------------------------------------------------------------------------|----------------------------------------------------------------|
| the ATBC study. <i>Br J Cancer</i> . 2014 Dec 9;111(12):2220-3. doi: 10.1038/bjc.2014.514.                                                                                                                                                                                                                                                                                                                                     |                                                                |
| <b>Lirussi, F.,Azzalini, L.,Orlando, S.,Orlando, R.,Angelico, F.</b> (2007). Antioxidant supplements for non-alcoholic fatty liver disease and/or steatohepatitis. <i>Cochrane Database of Systematic Reviews</i> . 2007. (1) (no pagination):#pages#                                                                                                                                                                          | Wrong publication type (not including original data)           |
| <b>Mondloch S, Gannon BM, Davis CR, Chileshe J, Kaliwile C, Masi C, Rios-Avila L, Gregory JF 3rd, Tanumihardjo SA.</b> (2015). High provitamin A carotenoid serum concentrations, elevated retinyl esters, and saturated retinol-binding protein in Zambian preschool children are consistent with the presence of high liver vitamin A stores. <i>Am J Clin Nutr</i> . 2015 Aug;102(2):497-504. doi: 10.3945/ajcn.115.112383. | Wrong exposure (no quantitative estimates of vitamin A intake) |
| <b>Papadimitrakopoulou, V. A.,Lee, J. J.,William Jr, W. N.,Martin, J. W.,Thomas, M.,Kim, E. S.,Khuri, F. R.,Shin, D. M.,Feng, L.,Waun, K. H.,Lippman, S. M.</b> (2009). Randomized trial of 13-cis retinoic acid compared with retinyl palmitate with or without beta-carotene in oral premalignancy. <i>Journal of Clinical Oncology</i> . 2009. 27(4):599-604                                                                | Outcome not relevant                                           |
| <b>Xiong, K.,Wang, J.,Zhang, B.,Xu, L.,Hu, Y.,Ma, A.</b> (2021). Vitamins A and D fail to protect against tuberculosis-drug-induced liver injury: A post hoc analysis of a previous randomized controlled trial. <i>Nutrition</i> . 2021. 86                                                                                                                                                                                   | Wrong duration (<3 months)                                     |
| <b>Zhang, X.,Chen, K.,Qu, P.,Liu, Y. X.,Li, T. Y.</b> (2010) Effect of biscuits fortified with different doses of vitamin A on indices of vitamin A status, haemoglobin and physical growth levels of pre-school children in Chongqing. <i>Public Health Nutrition</i> . 2010. 13:1462-71                                                                                                                                      | Outcome not relevant                                           |
| <b>Zhao, M.,Zhao, Y.,Li, T. Y.,Wang, R.,Qu, P.,Lian, X. M.,Mao, C. T.,Dai, Y.,Liu, Y. X.</b> (2006). Interventional effects of biscuits fortified with different doses of vitamin A on the vitamin A status in children of 3-6 years old. <i>Chinese Journal of Clinical Rehabilitation</i> . 2006. 10(16):158-161                                                                                                             | Outcome not relevant                                           |

**Table 5. Excluded studies during data extraction for SQ4a**

| Reference                                                                                                                                                                                                                                                               | Reason for exclusion                 |
|-------------------------------------------------------------------------------------------------------------------------------------------------------------------------------------------------------------------------------------------------------------------------|--------------------------------------|
| <b>Jafarirad, S.,Siassi, F.,Harirchian, M. H.,Amani, R.,Bitarafan, S.,Saboor-Yaraghi, A.</b> (2013). The effect of vitamin a supplementation on biochemical parameters in multiple sclerosis patients. <i>Iranian Red Crescent Medical Journal</i> . 2013. 15(3):194-8. | Duplicate of Bitarafan et al., 2015. |

### C.1. Bone health (sQ5a+b)

**Table 5. Excluded studies during full-text screening for sQ 5a and 5b**

| Reference                                                                                                                                                                                                                                                                                                   | Reason for exclusion                                                       |
|-------------------------------------------------------------------------------------------------------------------------------------------------------------------------------------------------------------------------------------------------------------------------------------------------------------|----------------------------------------------------------------------------|
| <b>Neufingerl N, Eilander A.</b> (2021). Nutrient Intake and Status in Adults Consuming Plant-Based Diets Compared to Meat-Eaters: A Systematic Review. <i>Nutrients</i> . 2021 Dec 23;14(1):29. doi: 10.3390/nu14010029.                                                                                   | Wrong publication type (systematic review, not reporting on original data) |
| <b>Pettersson C, Svedlund A, Wallengren O, Swolin-Eide D, Paulson Karlsson G, Ellegård L.</b> (2021). Dietary intake and nutritional status in adolescents and young adults with anorexia nervosa: A 3-year follow-up study. <i>Clin Nutr</i> . 2021 Oct;40(10):5391-5398. doi: 10.1016/j.clnu.2021.08.014. | Outcome not relevant                                                       |
| <b>Moradell A, Navarrete-Villanueva D, Fernández-García ÁI, Marín-Puyalto J, Gómez-Bruton A, Pedrero-Chamizo R, Pérez-Gómez J, Ara I, Casajus JA, Gómez-Cabello A, Vicente-Rodríguez G.</b> (2020). Role of Dietary Intake and Serum 25(OH)D on the Effects of a Multicomponent Exercise                    | Study duration (<12 months)                                                |

|                                                                                                                                                                                                                                                                                                                                                         |                                                                        |
|---------------------------------------------------------------------------------------------------------------------------------------------------------------------------------------------------------------------------------------------------------------------------------------------------------------------------------------------------------|------------------------------------------------------------------------|
| Program on Bone Mass and Structure of Frail and Pre-Frail Older Adults. <i>Nutrients</i> . 2020 Oct 1;12(10):3016. doi: 10.3390/nu12103016.                                                                                                                                                                                                             |                                                                        |
| <b>Tanumihardjo, S. A., Gannon, B. M., Kaliwile, C., Chileshe, J., Binkley, N. C.</b> (2019). Restricting vitamin A intake increases bone formation in Zambian children with high liver stores of vitamin. <i>Archives of Osteoporosis</i> . 2019. 14(1) (no pagination):                                                                               | Wrong outcome (bone turnover)                                          |
| <b>Xu J, Song C, Song X, Zhang X, Li X.</b> (2017). Carotenoids and risk of fracture: a meta-analysis of observational studies. <i>Oncotarget</i> . 2017 Jan 10;8(2):2391-2399. doi: 10.18632/oncotarget.13678.                                                                                                                                         | Wrong publication type (meta-analysis, not reporting on original data) |
| <b>Chen, G. D., Zhu, Y. Y., Cao, Y., Liu, J., Shi, W. Q., Liu, Z. M., Chen, Y. M.</b> (2015). Association of dietary consumption and serum levels of vitamin A and beta-carotene with bone mineral density in Chinese adults. <i>Bone</i> . 2015. 79(Oct):1105                                                                                          | Wrong study design (cross-sectional)                                   |
| <b>Joo, N. S., Yang, S. W., Song, B. C., Yeum, K. J.</b> (2015). Vitamin A intake, serum vitamin D and bone mineral density: Analysis of the Korea national health and nutrition examination survey (KNHANES, 2008-2011). <i>Nutrients</i> . 2015. 7(3):1716-1727                                                                                       | Wrong study design (cross-sectional)                                   |
| <b>Petersen, S. B., Rasmussen, M. A., Olsen, S. F., Vestergaard, P., Molgaard, C., Halldorsson, T. I., Strom, M.</b> (2015). Maternal dietary patterns during pregnancy in relation to offspring forearm fractures: Prospective study from the danish national birth cohort. <i>Nutrients</i> . 2015. 7(4):2382-2400                                    | Wrong outcome (fractures in offspring)                                 |
| <b>Snellman, G., Byberg, L., Lemming, E. W., Melhus, H., Gedeberg, R., Mallmin, H., Wolk, A., Michaelsson, K.</b> (2014). Long-term dietary vitamin D intake and risk of fracture and osteoporosis: A longitudinal cohort study of Swedish middle-aged and elderly women. <i>Journal of Clinical Endocrinology and Metabolism</i> . 2014. 99(3):781-790 | Wrong exposure (not dietary vitamin A/retinol)                         |
| <b>Ambrosini, G. L., Alfonso, H., Reid, A., Mackerras, D., Bremner, A. P., Beilby, J., Olsen, N. J., Musk, A. W., De Klerk, N. H.</b> (2014). Plasma retinol and total carotenes and fracture risk after long-term supplementation with high doses of retinol. <i>Nutrition</i> . 2014. 30(5):551-556                                                   | Wrong exposure (not dietary vitamin A/retinol)                         |
| <b>Dai Z, Wang R, Ang LW, Low YL, Yuan JM, Koh WP.</b> (2014). Protective effects of dietary carotenoids on risk of hip fracture in men: the Singapore Chinese Health Study. <i>J Bone Miner Res</i> . 2014 Feb;29(2):408-17. doi: 10.1002/jbmr.2041.                                                                                                   | Wrong exposure (no quantitative estimates of vitamin A)                |
| <b>Samieri, C., Ginder Coupez, V., Lorrain, S., Letenneur, L., Alles, B., Feart, C., Paineau, D., Barberger-Gateau, P.</b> (2013). Nutrient patterns and risk of fracture in older subjects: Results from the Three-City Study. <i>Osteoporosis International</i> . 2013. 24(4):1295-1305                                                               | Wrong exposure (only patterns, not individual nutrients)               |
| <b>Scott, D., Blizzard, L., Fell, J., Giles, G., Jones, G.</b> (2010). Associations between dietary nutrient intake and muscle mass and strength in community-dwelling older adults: The Tasmanian older adult cohort study. <i>Journal of the American Geriatrics Society</i> . 2010. 58(11):2129-2134                                                 | Wrong outcome (not bone-related)                                       |
| <b>Sahni S, Hannan MT, Blumberg J, Cupples LA, Kiel DP, Tucker KL.</b> (2009). Protective effect of total carotenoid and lycopene intake on the risk of hip fracture: a 17-year follow-up from the Framingham Osteoporosis Study. <i>J Bone Miner Res</i> . 2009 Jun;24(6):1086-94. doi: 10.1359/jbmr.090102.                                           | Wrong exposure (no quantitative estimates of vitamin A)                |
| <b>Sahni S, Hannan MT, Blumberg J, Cupples LA, Kiel DP, Tucker KL.</b> (2009). Inverse association of carotenoid intakes with 4-y change in bone mineral density in elderly men and women: the Framingham Osteoporosis Study. <i>Am J Clin Nutr</i> . 2009 Jan;89(1):416-24. doi: 10.3945/ajcn.2008.26388.                                              | Wrong exposure (no quantitative estimates of vitamin A)                |
| <b>Wang Y, Hodge AM, Wluka AE, English DR, Giles GG, O'Sullivan R, Forbes A, Cicuttini FM.</b> (2007). Effect of antioxidants on knee cartilage and bone in healthy, middle-aged subjects: a cross-sectional study. <i>Arthritis Res Ther</i> . 2007;9(4):R66. doi: 10.1186/ar2225.                                                                     | Wrong exposure (no quantitative estimates of vitamin A)                |

|                                                                                                                                                                                                                                                                                                                                              |                                                                            |
|----------------------------------------------------------------------------------------------------------------------------------------------------------------------------------------------------------------------------------------------------------------------------------------------------------------------------------------------|----------------------------------------------------------------------------|
| <b>Yazdanpanah, N., Zillikens, M. C., Rivadeneira, F., de Jong, R., Lindemans, J., Uitterlinden, A. G., Pols, H. A. P., van Meurs, J. B. J.</b> (2007). Effect of dietary B vitamins on BMD and risk of fracture in elderly men and women: The Rotterdam Study. <i>Bone</i> . 2007. 41(6):987-994                                            | Wrong study design                                                         |
| <b>Jackson HA, Sheehan AH.</b> (2005). Effect of vitamin A on fracture risk. <i>Ann Pharmacother</i> . 2005 Dec;39(12):2086-90. doi: 10.1345/aph.1G028.                                                                                                                                                                                      | Wrong publication type (review, not reporting on original data)            |
| <b>Wattanapenpaiboon, N., Lukito, W., Wahlqvist, M. L., Strauss, B. J. G.</b> (2003). Dietary carotenoid intake as a predictor of bone mineral density. <i>Asia Pacific Journal of Clinical Nutrition</i> . 2003. 12(4):467-473                                                                                                              | Wrong study design (cross-sectional)                                       |
| <b>Opotowsky, A. R., Bilezikian, J. P.</b> (2004). Serum vitamin A concentration and the risk of hip fracture among women 50 to 74 years old in the United States: A prospective analysis of the NHANES I follow-up study. <i>American Journal of Medicine</i> . 2004. 117(3):169-74.                                                        | Wrong exposure (serum, not dietary vitamin A)                              |
| <b>Crandall, C.</b> (2004). Vitamin A intake and osteoporosis: A clinical review. <i>Journal of Women's Health</i> . 2004. 13(8):939-953                                                                                                                                                                                                     | Wrong publication type (narrative review)                                  |
| <b>Komaroff, A.L.</b> (2002). Does Excess Vitamin A Cause Hip Fracture? <i>Harvard Women's Health Watch</i>                                                                                                                                                                                                                                  | Wrong publication type (review, not reporting on original data)            |
| <b>Ballew, C., Galuska, D., Gillespie, C.</b> (2001). High serum retinyl esters are not associated with reduced bone mineral density in the Third National Health and Nutrition Examination Survey, 1988-1994. <i>Journal of Bone and Mineral Research</i> . 2001. 16(12):2306-2312                                                          | Wrong study design (cross-sectional)                                       |
| <b>Khojah Q, AlRumaihi S, AlRajah G, Aburas A, AlOthman A, Ferwana M.</b> (2021). Vitamin A and its derivatives effect on bone mineral density, a systematic review. <i>J Family Med Prim Care</i> . 2021 Nov;10(11):4089-4095. doi: 10.4103/jfmpc.jfmpc_663_21.                                                                             | Wrong publication type (systematic review, not reporting on original data) |
| <b>Hathcock, J. N.</b> (2002). Does high intake of vitamin A pose a risk for osteoporotic fracture?. <i>JAMA</i> . 2002. 287:1396-7                                                                                                                                                                                                          | Wrong publication type (editorial)                                         |
| <b>Neville, C. E., Robson, P. J., Murray, L. J., Strain, J. J., Twisk, J., Gallagher, A. M., McGuinness, M., Cran, G. W., Ralston, S. H., Boreham, C. A.</b> (2002). The effect of nutrient intake on bone mineral status in young adults: the Northern Ireland young hearts project. <i>Calcified Tissue International</i> . 2002. 70:89-98 | Wrong exposure (not vitamin A)                                             |
| <b>Zhang X, Zhang R, Moore JB, Wang Y, Yan H, Wu Y, Tan A, Fu J, Shen Z, Qin G, Li R, Chen G.</b> (2017). The Effect of Vitamin A on Fracture Risk: A Meta-Analysis of Cohort Studies. <i>Int J Environ Res Public Health</i> . 2017 Sep 10;14(9):1043. doi: 10.3390/ijerph14091043.                                                         | Wrong publication type (meta-analysis, not reporting on original data)     |
| <b>Knapik JJ, Hoedebecke SS.</b> (2021). Vitamin A and Bone Fractures: Systematic Review and Meta-Analysis. <i>J Spec Oper Med</i> . 2021 Summer;21(2):100-107. doi: 10.55460/OGLF-K9ZU.                                                                                                                                                     | Wrong publication type (systematic review, not reporting on original data) |
| <b>Zhou P, Shao R, Wang H, Miao J, Wang X.</b> (2020). Dietary vitamin A, C, and E intake and subsequent fracture risk at various sites: A meta-analysis of prospective cohort studies. <i>Medicine (Baltimore)</i> . 2020 Aug 28;99(35):e20841. doi: 10.1097/MD.00000000000020841.                                                          | Wrong publication type (meta-analysis, not reporting on original data)     |
| <b>Wu AM, Huang CQ, Lin ZK, Tian NF, Ni WF, Wang XY, Xu HZ, Chi YL.</b> (2014). The relationship between vitamin A and risk of fracture: meta-analysis of prospective studies. <i>J Bone Miner Res</i> . 2014 Sep;29(9):2032-9. doi: 10.1002/jbmr.2237.                                                                                      | Wrong publication type (meta-analysis, not reporting on original data)     |

**Table 6. Excluded studies during data extraction for SQ5**

| Reference                                                                                                                 | Reason for exclusion                                                                                  |
|---------------------------------------------------------------------------------------------------------------------------|-------------------------------------------------------------------------------------------------------|
| <b>Ambrosini, G. L., Bremner, A. P., Reid, A., Mackerras, D., Alfonso, H., Olsen, N. J., Musk, A. W., De Klerk, N. H.</b> | A criterion for inclusion was that data from phase 1 of this study was made available by the authors. |

|                                                                                                                                                                                                                                                                                                                         |                                                                                                                                                                                                                                                                                                                                                                  |
|-------------------------------------------------------------------------------------------------------------------------------------------------------------------------------------------------------------------------------------------------------------------------------------------------------------------------|------------------------------------------------------------------------------------------------------------------------------------------------------------------------------------------------------------------------------------------------------------------------------------------------------------------------------------------------------------------|
| <p>(2013). No dose-dependent increase in fracture risk after long-term exposure to high doses of retinol or beta-carotene<br/><i>Osteoporos Int</i> (2013) 24:1285–1293</p>                                                                                                                                             | <p>Phase 1 of the study was a randomized controlled trial where subjects were supplemented with either retinyl esters or beta-carotene. Phase 2, which this publication reports on, was a non-randomized trial and did not fulfil eligibility criteria. We did not receive the data and this study has therefore been excluded at the data extraction stage.</p> |
| <p><b>de Jonge, E. A., Kiefte-de Jong, J. C., Campos-Obando, N., Booi, L., Franco, O. H., Hofman, A., Uitterlinden, A. G., Rivadeneira, F., Zillikens, M. C.</b> (2015). Dietary vitamin A intake and bone health in the elderly: the Rotterdam Study. <i>European Journal of Clinical Nutrition</i>. 2015. 69:1375</p> | <p>Duplicate of study already included (de Jonge et al., 2015)</p>                                                                                                                                                                                                                                                                                               |
