# Supplementary material for: Scientific opinion on the tolerable upper intake level for preformed vitamin A and β‐carotene
Source: PubMed Central journal article supplement (PMC11154838; doi:10.2903/j.efsa.2024.8814), 2024-06-06
Supplement: EFS2-22-e8814-s006.pdf [file EFS2-22-e8814-s006.pdf]

Annex to: EFSA NDA Panel, 2024. Scientific opinion on the tolerable upper intake level for preformed vitamin A and  $\beta$ -carotene. doi.org/10.2903/j.efsa.2024.8814

© 2024 Wiley-VCH Verlag GmbH & Co. KgaA on behalf of the European Food Safety Authority.

## Annex G – Additional information requested and decisions taken for the assessment

| Publication               | Information requested from the authors                                                                                                                                                                                                                                                                         | Authors' reply and decision taken                                                                                                                                                                                                                                                                                                                                                                                           |
|---------------------------|----------------------------------------------------------------------------------------------------------------------------------------------------------------------------------------------------------------------------------------------------------------------------------------------------------------|-----------------------------------------------------------------------------------------------------------------------------------------------------------------------------------------------------------------------------------------------------------------------------------------------------------------------------------------------------------------------------------------------------------------------------|
| Barker et al. (2005)      | Summary statistics on intakes from supplements (from cod liver oil and multivitamin supplements) among cases and controls. Additionally, also the summary statistics for serum retinyl palmitate for all categories of intake.                                                                                 | Some raw data was provided but it was not possible to calculate the intake estimates from supplements or the concentrations for the different quartiles of serum retinyl palmitate.<br><br>The study was included in the assessment with the available information reported in the publication.                                                                                                                             |
| Bille et al. (2007)       | To clarify whether the results presented pertain to preformed or total vitamin A (i.e., including beta carotene supplements) supplementation.                                                                                                                                                                  | The study authors confirmed the results pertain to preformed vitamin A supplementation.                                                                                                                                                                                                                                                                                                                                     |
| Rejnmark et al. (2004)    | Number of fracture cases per quintile of preformed vitamin A                                                                                                                                                                                                                                                   | The study authors no longer had access to the data. Study was kept in the assessment and the analyses on categories of intake for which we had the number of cases was used.                                                                                                                                                                                                                                                |
| Michaëlsson et al. (2003) | To clarify what the exposure "vitamin A" entails. The means, standard deviations and quintile limits for vitamin A intake (with and without supplements).<br><br>If available, to provide the analysis for the middle quintiles, the number of participants per quintile and number of fractures per quintile. | The study authors clarified the two vitamin A exposures refer to preformed vitamin A from background diet only and preformed vitamin A from diet and supplements. They also provided the means, SDs and quintile limits.<br><br>They were not able to provide the analysis for the middle quintiles (Q2-4) or the number of participants and number of cases per quintile.<br><br>The study was included in the assessment. |
| Lim et al. (2004)         | The means and standard deviations for the vitamin A intake categories that were reported as ranges, with the lowest and highest category reported as open categories.                                                                                                                                          | The study authors no longer had access to the data. The study was included in the assessment and the analyses on quintiles of intake for which the ranges and means were available was used.                                                                                                                                                                                                                                |

|                         |                                                                                                                                                                                                                                                                                                                                                                                                                                     |                                                                                                                                                                                                                                                                                                                                            |
|-------------------------|-------------------------------------------------------------------------------------------------------------------------------------------------------------------------------------------------------------------------------------------------------------------------------------------------------------------------------------------------------------------------------------------------------------------------------------|--------------------------------------------------------------------------------------------------------------------------------------------------------------------------------------------------------------------------------------------------------------------------------------------------------------------------------------------|
| Kaptoge et al. (2003)   | To clarify what the exposure "vitamin A" entail and the mean intakes per tertile.                                                                                                                                                                                                                                                                                                                                                   | No response received. As exposure was reported in mcg/d only, with separate intake reported for $\beta$ -carotene, this information taken together with the means reported for the population sampled, it was assumed the term "vitamin A" refers to preformed vitamin A only.                                                             |
| Macdonald et al. (2004) | Baseline carotenoid intake levels                                                                                                                                                                                                                                                                                                                                                                                                   | The study authors no longer had access to the data. Study was kept in the assessment for the analysis on preformed and total vitamin A.                                                                                                                                                                                                    |
| Key et al. (2007)       | The total number of women and men per category of retinol intake. If available, the mean, standard deviation, and range of intake per retinol category. To clarify whether the estimated retinol intakes in the study was from food only or if the amount from supplements was also considered.                                                                                                                                     | The requested data was provided by the study authors though it was based on an updated dataset that included ~1000 participants more (total n=35702). The study authors stated that the mean and SD would not have substantially changed with the additional participants. It was clarified that the estimated intakes are from food only. |
| Ambrosini et al. (2013) | The results of the analysis for fracture risk for the 1 <sup>st</sup> phase of the intervention study when participants were receiving either retinyl esters or beta-carotene.                                                                                                                                                                                                                                                      | No response received from the study authors. Phase 1 of the study was a randomized controlled trial where subjects were supplemented with either retinyl esters or $\beta$ -carotene. The study was excluded from the assessment as it only reports on phase 2 of the trial and did not fulfil eligibility criteria.                       |
| de Jonge et al. (2015)  | To clarify whether the risk estimates presented in Figure 2b are hazard ratios and accompanying 95% CIs for the quintiles of total dietary vitamin A intake and retinol intake, and whether these are energy-adjusted. The number of non-cases (or total study participants) in each quintile of energy-adjusted total vitamin A and retinol. The range of intake for each quintile of energy-adjusted total vitamin A and retinol. | The study authors clarified the estimates refer to hazard ratios and confirmed the use of energy adjusted quintiles. The number of cases and total participants was available in a supplementary table. The range of intakes was not available and would require new analysis.<br><br>The information provided was used in the assessment. |
| White et al. (2006)     | To clarify whether vitamin A supplements reported in the paper included beta-carotene or retinol only.                                                                                                                                                                                                                                                                                                                              | The study authors clarified that participants were asked to report on the vitamin A content of the supplement, but given that the assessment was carried out in the early 1980s they assume these were retinol supplements. The exposure was categorized as preformed vitamin A in the assessment.                                         |
| Hayhoe et al. (2017)    | To provide the analyses for retinol intake from diet and supplements for risk of                                                                                                                                                                                                                                                                                                                                                    | The requested data was provided and included in the assessment.                                                                                                                                                                                                                                                                            |

|  |                                                                                                                                                             |  |
|--|-------------------------------------------------------------------------------------------------------------------------------------------------------------|--|
|  | fracture. To provide the risk estimates for the middle quintiles (Q2-5) for the diet analyses. To provide mean retinol intakes for the quintiles of intake. |  |
|--|-------------------------------------------------------------------------------------------------------------------------------------------------------------|--|

## References

- Ambrosini GL, Bremner AP, Reid A, Mackerras D, Alfonso H, Olsen NJ, Musk AW and de Klerk NH, 2013. No dose-dependent increase in fracture risk after long-term exposure to high doses of retinol or beta-carotene. *Osteoporos Int*, 24:1285-1293. doi: 10.1007/s00198-012-2131-6
- Barker ME, McCloskey E, Saha S, Gossiel F, Charlesworth D, Powers HJ and Blumsohn A, 2005. Serum retinoids and beta-carotene as predictors of hip and other fractures in elderly women. *J Bone Miner Res*, 20:913-920. doi: 10.1359/jbmr.050112
- Bille C, Olsen J, Vach W, Knudsen VK, Olsen SF, Rasmussen K, Murray JC, Andersen AM and Christensen K, 2007. Oral clefts and life style factors--a case-cohort study based on prospective Danish data. *European Journal of Epidemiology*, 22:173-181. doi: 10.1007/s10654-006-9099-5
- de Jonge EA, Kieffe-de Jong JC, Campos-Obando N, Booij L, Franco OH, Hofman A, Uitterlinden AG, Rivadeneira F and Zillikens MC, 2015. Dietary vitamin A intake and bone health in the elderly: the Rotterdam Study. *Eur J Clin Nutr*, 69:1360-1368. doi: 10.1038/ejcn.2015.154
- Hayhoe RPG, Lentjes MAH, Mulligan AA, Luben RN, Khaw KT and Welch AA, 2017. Carotenoid dietary intakes and plasma concentrations are associated with heel bone ultrasound attenuation and osteoporotic fracture risk in the European Prospective Investigation into Cancer and Nutrition (EPIC)-Norfolk cohort. *he British journal of nutrition*, 117:1439-1453. doi: 10.1017/s0007114517001180
- Kaptoge S, Welch A, McTaggart A, Mulligan A, Dalzell N, Day NE, Bingham S, Khaw KT and Reeve J, 2003. Effects of dietary nutrients and food groups on bone loss from the proximal femur in men and women in the 7th and 8th decades of age. *Osteoporos Int*, 14:418-428. doi: 10.1007/s00198-003-1391-6
- Key TJ, Appleby PN, Spencer EA, Roddam AW, Neale RE and Allen NE, 2007. Calcium, diet and fracture risk: a prospective study of 1898 incident fractures among 34 696 British women and men. *Public Health Nutr*, 10:1314-1320. doi: 10.1017/s1368980007696402
- Lim LS, Harnack LJ, Lazovich D and Folsom AR, 2004. Vitamin A intake and the risk of hip fracture in postmenopausal women: the Iowa Women's Health Study. *Osteoporosis International*, 15:552-559. doi: 10.1007/s00198-003-1577-y
- Macdonald HM, New SA, Golden MH, Campbell MK and Reid DM, 2004. Nutritional associations with bone loss during the menopausal transition: evidence of a beneficial effect of calcium, alcohol, and fruit and vegetable nutrients and of a detrimental effect of fatty acids. *Am J Clin Nutr*, 79:155-165. doi: 10.1093/ajcn/79.1.155
- Michaëlsson K, Lithell H, Vessby B and Melhus H, 2003. Serum retinol levels and the risk of fracture. *New England Journal of Medicine*, 348:287-294. doi: 10.1056/NEJMoa021171
- Rejnmark L, Vestergaard P, Charles P, Hermann AP, Brot C, Eiken P and Mosekilde L, 2004. No effect of vitamin A intake on bone mineral density and fracture risk in perimenopausal women. *Osteoporos Int*, 15:872-880. doi: 10.1007/s00198-004-1618-1
- White SC, Atchison KA, Gornbein JA, Nattiv A, Paganini-Hill A and Service SK, 2006. Risk factors for fractures in older men and women: The Leisure World Cohort Study. *Gend Med*, 3:110-123. doi: 10.1016/s1550-8579(06)80200-7
